# Supplementary material
Source: MDPI journal article supplement (https://www.mdpi.com/1424-2818/14/8/649)

# BOLD TaxonID Tree

Title : Tree Result - DS-DECA01 (65 records selected)  
Date : 20-Apr-2022  
Data Type : Nucleotide  
Distance Model : Kimura 2 Parameter  
Marker : COI-5P  
Colourization : [blue]=Stop Codons [red]=Contamination or misidentification

Label : Sample ID  
Label : Taxon  
Label : Exact Site  
Label : Barcode Cluster (BIN)

Sequence Count : 65  
Species count : 20  
Genus count : 15  
Family count : 11  
Unidentified : 1

BIN Count : 21

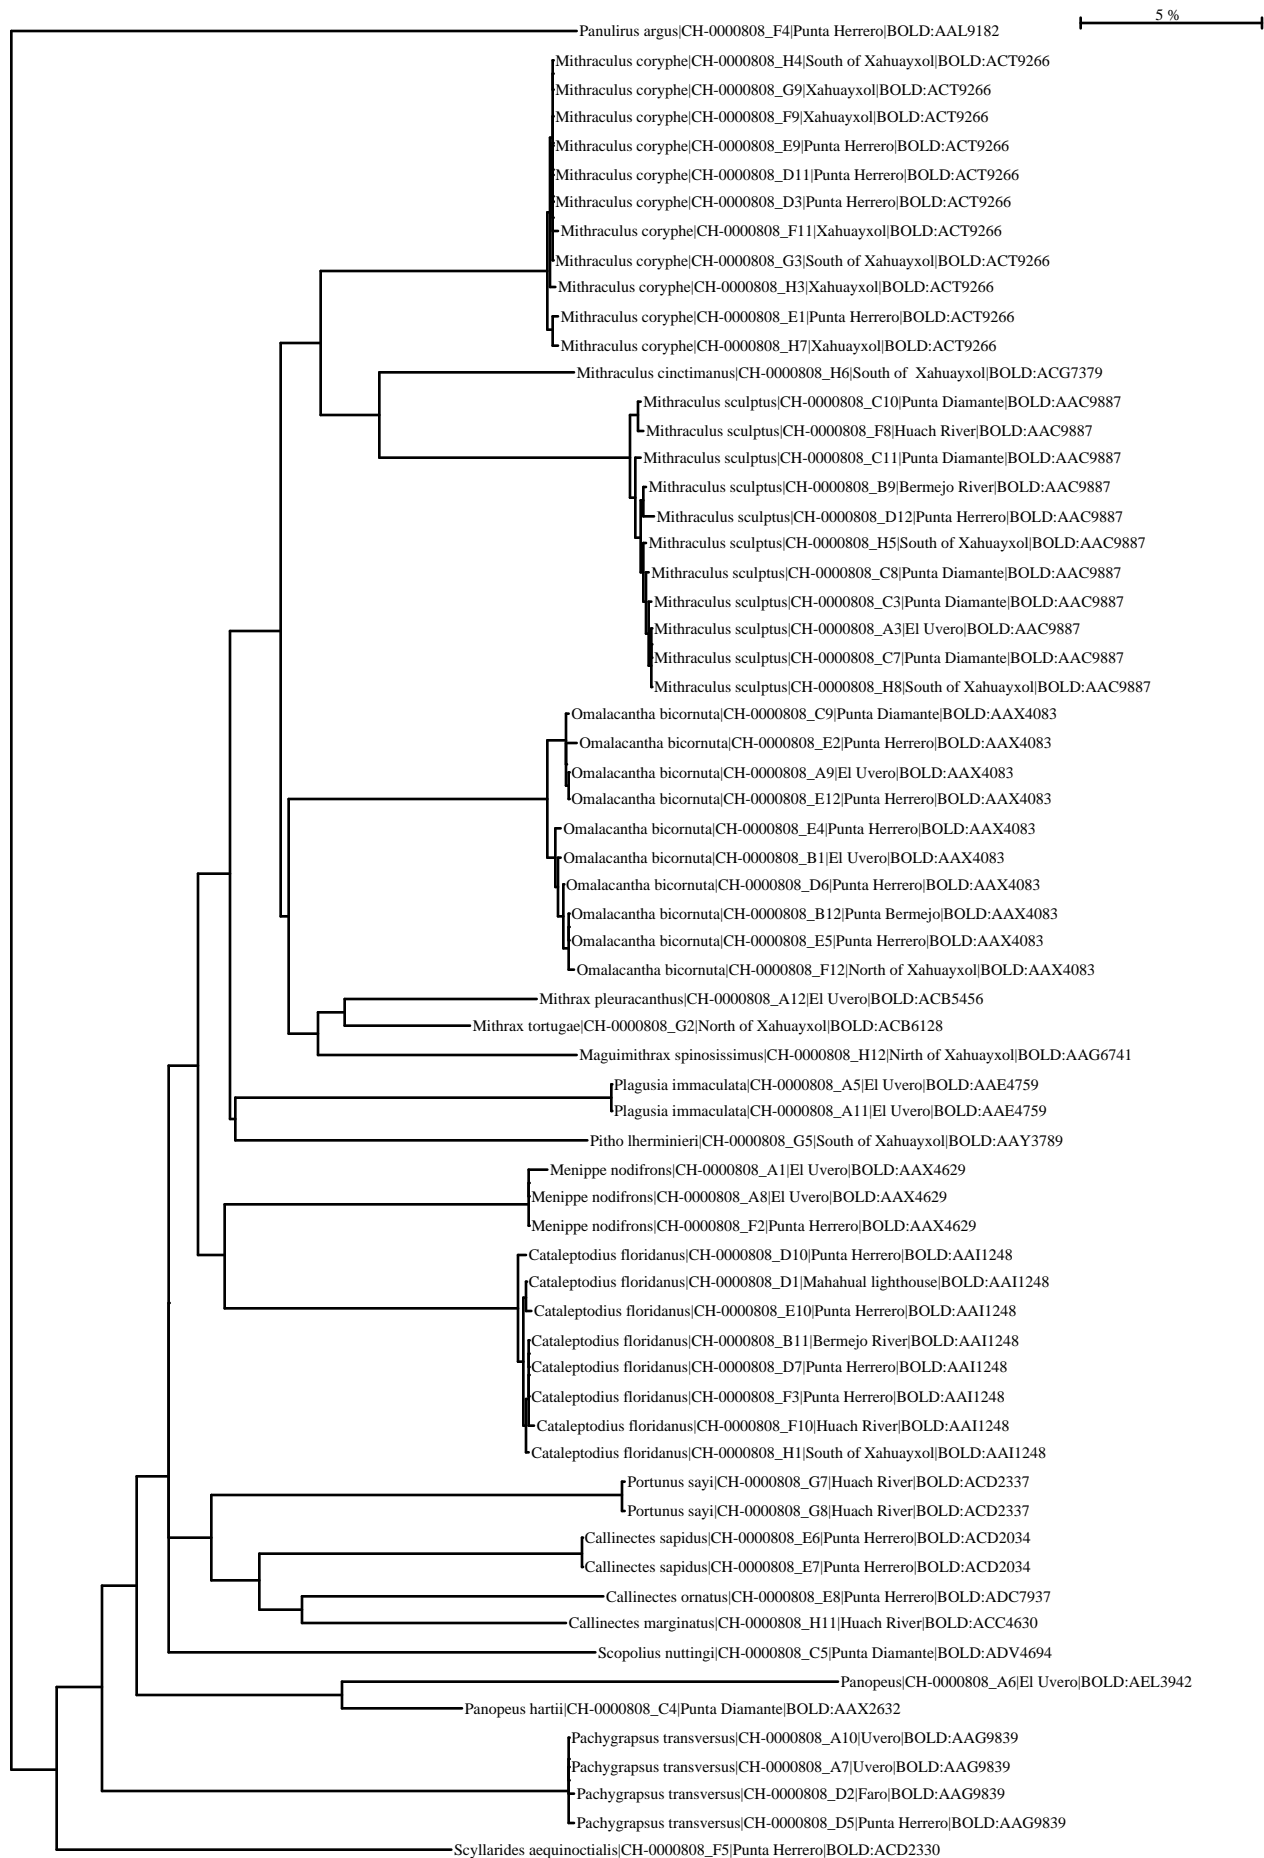

Supplement: s1 [file s1]
