# Supplementary material
Source: MDPI journal article supplement (https://www.mdpi.com/1424-2818/14/8/649)
Supplement: s1 [file s1]

## Supplementary Material

**Table S1.** List of current Achelata and Brachyura decapods recorded in the Southern Mexican Caribbean. + –Species with DNA barcode present in the BOLD dataset; \*– recorded in this work; ✓ –new record; N/A –no barcode sequence available. The numbers inside the square brackets correspond to the references.

| Species                                        | Type locality | Distribution                                                                                                                                | Record in the SMC                                         | Ecological notes                                                                                  | Species sequences recovered from this study (Process ID) | Barcode sequence available | BINs                                         |
|------------------------------------------------|---------------|---------------------------------------------------------------------------------------------------------------------------------------------|-----------------------------------------------------------|---------------------------------------------------------------------------------------------------|----------------------------------------------------------|----------------------------|----------------------------------------------|
| Infraorder Achelata                            |               |                                                                                                                                             |                                                           |                                                                                                   |                                                          |                            |                                              |
| Family Palinuridae                             |               |                                                                                                                                             |                                                           |                                                                                                   |                                                          |                            |                                              |
| <i>Panulirus argus</i><br>Latreille, 1804      | Unknown       | Western Atlantic: from USA (North Carolina) to Venezuela; including Bermuda, Virgin Islands, and islands of the Caribbean Arc [51, 52]      | El Uvero, *<br>Mahahual, and<br>Punta Herrero<br>[15, 53] | Among rocks, sponges, reefs, under coralline rubble, and seagrass beds. 1-90 m depth [13, 54, 55] | DSCMX064-21                                              | +                          | BOLD:AAL9182<br>BOLD:ACD2165<br>BOLD:ACI1332 |
| <i>Panulirus guttatus</i><br>(Latreille, 1804) | Suriname      | Western Atlantic: from USA (Florida) to Suriname; including Bermuda, Cuba, islands of the Caribbean Arc, and islands off Venezuela [52, 56] | Banco<br>Chinchorro, and<br>El Uvero [15, 31]             | In rocky areas, reef lagoon and crevices. 1-20 m depth [51, 55]                                   |                                                          | +                          | BOLD:AAK5129                                 |
| Family Scyllaridae                             |               |                                                                                                                                             |                                                           |                                                                                                   |                                                          |                            |                                              |

|                                                        |                            |                                                                                                                                                                                                                                                                                                     |                                                       |   |                                                                                                                                               |             |   |                              |
|--------------------------------------------------------|----------------------------|-----------------------------------------------------------------------------------------------------------------------------------------------------------------------------------------------------------------------------------------------------------------------------------------------------|-------------------------------------------------------|---|-----------------------------------------------------------------------------------------------------------------------------------------------|-------------|---|------------------------------|
| <i>Parribacus antarcticus</i><br>(Lund, 1793)          | Ambon Island,<br>Indonesia | Western Atlantic: from USA<br>(Florida) to northeast Brazil;<br>including Virgin Islands, islands of<br>the Caribbean Arc, and islands off<br>Venezuela. Eastern Atlantic: Africa<br>(Cabo Verde). Indo-West Pacific:<br>from the east and southeast Africa<br>to Hawaii and Polynesia [51, 57, 58] | El Uvero [15]                                         |   | In coralline or stone reefs<br>with sandy bottom. 1-8 m<br>depth [51, 55]                                                                     |             | + | BOLD:ACB6295                 |
| <i>Scyllarides<br/>aequinotialis</i> (Lund,<br>1793)   | Jamaica                    | Western Atlantic: from USA (south<br>Carolina) to Brazil (São Paulo);<br>including Bermuda, Virgin Islands,<br>islands of the Caribbean Arc, and<br>islands off Venezuela [51, 55]                                                                                                                  | Banco<br>Chinchorro [15,<br>59], and Punta<br>Herrero | * | In sandy or rocky<br>substrates, often on outer<br>reefs. 1-180 m depth [51, 55]                                                              | DSCMX065-21 | + | BOLD:ACD2330                 |
| Infraorder Brachyura                                   |                            |                                                                                                                                                                                                                                                                                                     |                                                       |   |                                                                                                                                               |             |   |                              |
| Family Calappidae                                      |                            |                                                                                                                                                                                                                                                                                                     |                                                       |   |                                                                                                                                               |             |   |                              |
| <i>Calappa ocellata</i><br>Holthuis, 1958              | Klein Bonaire              | Western Atlantic: from USA (North<br>Carolina) to Brazil (Santa Catarina);<br>including Bermuda, Virgin Islands,<br>islands of the Caribbean Arc, and<br>islands off Venezuela [39, 51, 54]                                                                                                         | Xahuayxol [14]                                        |   | Among corals, muddy,<br>sandy, gravel, and stone<br>bottoms; in stomach<br>contents of <i>Bothus ocellatus</i> .<br>5-80 m depth [39, 51, 54] |             | + | BOLD:ACT9710<br>BOLD:ACC4665 |
| Family<br>Cryptochiridae                               |                            |                                                                                                                                                                                                                                                                                                     |                                                       |   |                                                                                                                                               |             |   |                              |
| <i>Troglocarcinus<br/>corallicola</i> Verrill,<br>1908 | Bermuda                    | Western Atlantic: from USA<br>(Florida) to Brazil; including<br>Bermuda, islands of the Caribbean<br>Arc, and Curaçao. Eastern Atlantic:<br>Africa (from islands of Sao Tome to<br>off Gabon) [51, 60]                                                                                              | Mahahual [14]                                         |   | In cavities or upper surface<br>of living corals. 1-75 m<br>depth [51, 60]                                                                    |             | + | BOLD:ADW6781                 |

|                                                       |                              |                                                                                                                                                                                |                                                                                                |                                                                                                                                  |     |                                                                              |
|-------------------------------------------------------|------------------------------|--------------------------------------------------------------------------------------------------------------------------------------------------------------------------------|------------------------------------------------------------------------------------------------|----------------------------------------------------------------------------------------------------------------------------------|-----|------------------------------------------------------------------------------|
| Family                                                |                              |                                                                                                                                                                                |                                                                                                |                                                                                                                                  |     |                                                                              |
| Cyclodorippidae                                       |                              |                                                                                                                                                                                |                                                                                                |                                                                                                                                  |     |                                                                              |
| <i>Neocorycodus stimpsoni</i> (Rathbun, 1937)         | West coast of Florida, USA   | Western Atlantic: USA (Florida), and Southern Mexican Caribbean [15, 40]                                                                                                       | Banco Chinchorro (Outside of Central Key) [15]                                                 | In fine sand composed primarily of carbonates. Up to 183 m depth [6, 23]                                                         | N/A |                                                                              |
| Family Dromiidae                                      |                              |                                                                                                                                                                                |                                                                                                |                                                                                                                                  |     |                                                                              |
| <i>Moreiradromia antillensis</i> (Stimpson, 1859)     | St. Thomas; and Florida, USA | Western Atlantic: from USA (North Carolina) to Brazil (Rio de Janeiro); including Virgin Islands, islands of the Caribbean Arc, and islands off Venezuela [51, 61]             | El Placer, Rio Indio, and Xahuayxol [14, 15]                                                   | In coralline rock, and <i>Aliger gigas</i> shell. Symbiont of ascidians, sponges, or zoanthid polyps. 1-330 m depth [13, 39, 51] | +   | BOLD:ADC6534                                                                 |
| Family Epialtidae                                     |                              |                                                                                                                                                                                |                                                                                                |                                                                                                                                  |     |                                                                              |
| <i>Epialtus bituberculatus</i> H. Milne Edwards, 1834 | Chile                        | Western Atlantic: from USA (Florida) to Brazil (Pernambuco); including Virgin Islands, islands of the Caribbean Arc, and islands off Venezuela [13, 40, 51]                    | El Placer [15]                                                                                 | Among algae covering coral rubble. 1-2 m depth [13, 51]                                                                          | +   | BOLD:ACQ5815<br>BOLD:ACQ5816<br>BOLD:ACQ1713<br>BOLD:AAJ0619<br>BOLD:ACG7953 |
| <i>Epialtus dilatatus</i> A. Milne-Edwards, 1878      | St. Thomas                   | Western Atlantic: USA (North Carolina, Florida), Bahamas, Mexico (Yucatan, Quintana Roo), Virgin Islands, islands of the Caribbean Arc, and islands off Venezuela [13, 40, 51] | El Placer, Mahahual, Punta Herradura, Xahuayxol, and Banco Chinchorro (Lobos Key) [14, 15, 31] | In algae, shell reefs, coralline, and sandy bottoms. 2-22 m depth [13, 39, 51]                                                   | +   | BOLD:ACQ6801                                                                 |

|                                                       |                        |                                                                                                                                            |                                                                  |                                                                                       |     |              |
|-------------------------------------------------------|------------------------|--------------------------------------------------------------------------------------------------------------------------------------------|------------------------------------------------------------------|---------------------------------------------------------------------------------------|-----|--------------|
| <i>Epialtus longirostris</i><br>Stimpson, 1860        | St. Thomas             | Western Atlantic: USA (Florida), Mexican Caribbean, islands of the Caribbean Arc, and Virgin Islands [15, 40, 51]                          | El Placer, and Rio Indio [15]                                    | In reef lagoon. 3-54 m depth [15, 51]                                                 | N/A |              |
| <i>Leptopisa setirostris</i><br>(Stimpson, 1871)      | Key West, Florida, USA | Western Atlantic: from USA (Florida) to Brazil; including Virgin Islands, islands of the Caribbean Arc, and islands off Venezuela [40, 51] | Banco Chinchorro [15]                                            | In coralline rocks. 1-80 m depth [15, 51]                                             | N/A |              |
| <i>Macrocoeloma camptocerum</i><br>(Stimpson, 1871)   | Key West, Florida, USA | Western Atlantic: USA (from North Carolina to Florida), and Southern Mexican Caribbean [15, 40]                                            | Mahahual, and Banco Chinchorro (outside of Central Key) [14, 15] | In sand with seagrass; rocky and coralline bottoms. 3.7-24 m depth [37, 39]           | N/A |              |
| <i>Macrocoeloma diplacanthum</i><br>(Stimpson, 1860)  | St. Thomas             | Western Atlantic: USA (Florida), Mexican Caribbean, Virgin Islands, islands of the Caribbean Arc, and islands off Venezuela [13, 40, 51]   | Xahuayxol, El Placer, and El Uvero [15, 62]                      | In reef lagoon, seagrass, and coralline rocks. 1-29 m depth [15, 51]                  | +   | BOLD:ACT8809 |
| <i>Macrocoeloma subparallelum</i><br>(Stimpson, 1860) | St. Thomas             | Western Atlantic: Mexican Caribbean, Panama, Virgin Islands, islands of the Caribbean Arc, islands off Venezuela, and Brazil [22, 51, 16]  | Mahahual [15]                                                    | In coral reefs, tidal pools, and sandy bottoms with macroalgae. 1-25 m depth [51, 62] | +   | BOLD:ACT9697 |

|                                             |                                 |                                                                                                                                                                                                         |                                |                                                                                                                                             |     |              |
|---------------------------------------------|---------------------------------|---------------------------------------------------------------------------------------------------------------------------------------------------------------------------------------------------------|--------------------------------|---------------------------------------------------------------------------------------------------------------------------------------------|-----|--------------|
| <i>Tyche emarginata</i><br>White, 1847      | West Indies                     | Western Atlantic: USA (North Carolina, Florida), Bahamas, Southern Mexican Caribbean, south coast of Cuba, Virgin Islands, islands of the Caribbean Arc, islands off Venezuela, and Brazil [15, 51, 62] | South of Banco Chinchorro [15] | In rocky or coarse shell bottoms, in macroalgae <i>Crassiphycus crassissimus</i> and <i>C. corneus</i> . 2-37 m depth [37, 51, 16]          | N/A |              |
| Family Eriphiidae                           |                                 |                                                                                                                                                                                                         |                                |                                                                                                                                             |     |              |
| <i>Eriphia gonagra</i><br>(Fabricius, 1781) | Jamaica                         | Western Atlantic: from USA (North Carolina) to Brazil (Santa Catarina); including Bermuda, Virgin Islands, islands of the Caribbean Arc, and the islands off Venezuela [51, 63]                         | El Uvero [15]                  | In coralline reefs, rocky shores, tide pools, crevices of dead coral; oyster beds; sponges, algae, and hydrozoans. 0-3 m depth [15, 36, 61] | +   | BOLD:ACG8098 |
| Family Euryplacidae                         |                                 |                                                                                                                                                                                                         |                                |                                                                                                                                             |     |              |
| <i>Euryplax nitida</i><br>Stimpson, 1859    | St. Petersburg,<br>Florida, USA | Western Atlantic: from USA (North Carolina) to Southern Brazil; including Bermuda, islands of the Caribbean Arc, and islands off Venezuela [51, 64]                                                     | Xahuayxol [14]                 | In sandy, shell, seagrass, and muddy bottoms. Found in stomach contents of <i>Holocentrus rufus</i> . 4-90 m depth [39, 51]                 | N/A |              |
| Family Gecarcinidae                         |                                 |                                                                                                                                                                                                         |                                |                                                                                                                                             |     |              |

|                                                               |                                |                                                                                                                                                                                                                                                                                                                                                  |                                                         |   |                                                                                            |                                                          |     |              |
|---------------------------------------------------------------|--------------------------------|--------------------------------------------------------------------------------------------------------------------------------------------------------------------------------------------------------------------------------------------------------------------------------------------------------------------------------------------------|---------------------------------------------------------|---|--------------------------------------------------------------------------------------------|----------------------------------------------------------|-----|--------------|
| <i>Gecarcinus lateralis</i><br>Fréminville in<br>Guérin, 1832 | Guadeloupe,<br>Lesser Antilles | Western Atlantic: Bermuda, USA<br>(Florida, Texas), Bahamas, Mexico<br>(Yucatan, Quintana Roo),<br>Honduras to Costa Rica, Colombia<br>to Surinam, Cuba, Jamaica, Puerto<br>Rico, Virgin Islands, islands of the<br>Caribbean Arc, and islands off<br>Venezuela [13, 40, 51]                                                                     | Xahuayxol, and<br>Mahahual [14, 31]                     |   | Found in wooded areas<br>(mangroove) [65]                                                  |                                                          | N/A |              |
| Family Grapsidae                                              |                                |                                                                                                                                                                                                                                                                                                                                                  |                                                         |   |                                                                                            |                                                          |     |              |
| <i>Goniopsis cruentata</i><br>(Latreille, 1803)               | Martinique,<br>Antilles        | Western Atlantic: from USA<br>(northwest Florida) to Brazil (Santa<br>Catarina); including Bermuda,<br>Virgin Islands, islands of the<br>Caribbean Arc, and islands off<br>Venezuela. Eastern Atlantic: Africa<br>(from Senegal to northern Angola)<br>[40, 51, 63]                                                                              | Bermejo River<br>[14]                                   |   | In rocky shore, estuarine<br>areas, mangrove roots and<br>trunks. Intertidal [62]          |                                                          | +   | BOLD:ACG7928 |
| <i>Pachygrapsus</i><br><i>transversus</i> (Gibbes,<br>1850)   | Key West, Florida,<br>USA      | Western Atlantic: from USA (North<br>Carolina) to Uruguay<br>(Montevideo); including Bermuda,<br>Virgin Islands, islands of the<br>Caribbean Arc, and islands off<br>Venezuela. Easter Atlantic: from<br>Mediterranean Sea to Africa<br>(Angola). Eastern Pacific: from USA<br>(California) to Peru; including<br>Galapagos Islands [13, 40, 51] | El Uvero,<br>Mahahual [14,<br>15], and Punta<br>Herrero | * | Found in roots of<br>mangroves, sponges and<br>sandy-rocky beaches.<br>Intertidal [13, 62] | DSCMX007-21<br>DSCMX010-21<br>DSCMX038-21<br>DSCMX041-21 | +   | BOLD:AAG9839 |
| Family Homolidae                                              |                                |                                                                                                                                                                                                                                                                                                                                                  |                                                         |   |                                                                                            |                                                          |     |              |

|                                                   |                                                              |                                                                                                                                                                                                        |                                                                                                                          |                                                                                                                                                                                          |     |                              |
|---------------------------------------------------|--------------------------------------------------------------|--------------------------------------------------------------------------------------------------------------------------------------------------------------------------------------------------------|--------------------------------------------------------------------------------------------------------------------------|------------------------------------------------------------------------------------------------------------------------------------------------------------------------------------------|-----|------------------------------|
| <i>Homola barbata</i><br>(Fabricius, 1793)        | Bay of Naples,<br>Italy                                      | Western Atlantic: from USA<br>(Massachusetts) to Brazil (Rio<br>Grande do Sul). Mediterranean Sea.<br>Eastern Atlantic: from Portugal and<br>Azores to Cape Verde and Angola;<br>south Africa [40, 63] | South of Banco<br>Chinchorro [15]                                                                                        | 55 to 682 m depth [39]                                                                                                                                                                   | +   | BOLD:AAI8246<br>BOLD:ADM8249 |
| Family Inachidae                                  |                                                              |                                                                                                                                                                                                        |                                                                                                                          |                                                                                                                                                                                          |     |                              |
| <i>Coryrhynchus riisei</i><br>(Stimpson, 1860)    | St. Thomas                                                   | Western Atlantic: from USA (North<br>Carolina) to Brazil; including<br>Bermuda, Virgin Islands, islands of<br>the Caribbean Arc, and islands off<br>Venezuela [40, 51, 54]                             | Punta Herradura<br>[15]                                                                                                  | In corals ( <i>Agaricia<br/>tenuifolia</i> ), sandy, shell and<br>gravel bottoms, calcareous<br>algae, seagrass, and<br><i>Sargassum</i> . 1-140 m depth<br>[51, 54, 65]                 | N/A |                              |
| Family Inachoididae                               |                                                              |                                                                                                                                                                                                        |                                                                                                                          |                                                                                                                                                                                          |     |                              |
| <i>Arachnopsis filipes</i><br>Stimpson, 1871      | off Conch,<br>Carysfort and<br>French Reefs,<br>Florida, USA | Western Atlantic: USA (from North<br>Carolina to off northwest Florida),<br>Southern Mexican Caribbean,<br>islands of the Caribbean Arc, and<br>Brazil (off Rio Grande do Norte)<br>[15, 31, 40, 51]   | South of Punta<br>Herrero,<br>Mahahual, and<br>Banco<br>Chinchorro [15,<br>31]                                           | In fine sand, shell, coralline,<br>and sponge bottoms; in<br>calcareous algae<br>( <i>Lithothamnion</i> ). 27-238 m<br>depth [39, 51]                                                    | N/A |                              |
| <i>Stenorhynchus seticornis</i> (Herbst,<br>1788) | Curaçao                                                      | Western Atlantic: from USA (North<br>Carolina) to Argentina; including<br>Virgin Islands, islands of the<br>Caribbean Arc, and islands off<br>Venezuela<br>[51, 63]                                    | Punta Herrero, El<br>Placer, Rio Indio,<br>Punta Gavilan,<br>Mahahual,<br>Xcalak, and<br>Banco<br>Chinchorro [15,<br>31] | In beaches and estuarine<br>areas, coralline rocks,<br>calcareous algae, sandy,<br>shell bottoms, bryozoan<br>( <i>Schizoporella</i> ) and sponges.<br>1-366 m depth [51, 54, 62,<br>65] | +   | BOLD:AAJ5290                 |

|                                                |                                                                 |                                                                                                                                                                                                                       |                             |   |                                                                                                                                      |                                           |                                       |
|------------------------------------------------|-----------------------------------------------------------------|-----------------------------------------------------------------------------------------------------------------------------------------------------------------------------------------------------------------------|-----------------------------|---|--------------------------------------------------------------------------------------------------------------------------------------|-------------------------------------------|---------------------------------------|
| Family Leucosiidae                             |                                                                 |                                                                                                                                                                                                                       |                             |   |                                                                                                                                      |                                           |                                       |
| <i>Ebalia stimpsoni</i> A. Milne Edwards, 1880 | Barbados                                                        | Western Atlantic: USA (North Carolina and Florida), Southern Mexican Caribbean, islands of the Caribbean Arc, and Brazil (off mouth of Amazon River) [14, 40, 51]                                                     | Xahuayxol [14]              |   | In sandy, muddy, shell, and coralline bottoms. 4-160 m depth [39, 51]                                                                |                                           | N/A                                   |
| <i>Uhlias limbatus</i> Stimpson, 1871          | St. Thomas                                                      | Western Atlantic: USA (Florida), Mexican Caribbean, Virgin Islands, islands of the Caribbean Arc, and islands off Venezuela [13, 40, 51]                                                                              | Xahuayxol [14]              |   | In coralline rubble. 4-64 m [13, 51]                                                                                                 |                                           | N/A                                   |
| Family Menippidae                              |                                                                 |                                                                                                                                                                                                                       |                             |   |                                                                                                                                      |                                           |                                       |
| <i>Menippe mercenaria</i> (Say, 1818)          | "The Southern States", probably Charleston, south Carolina, USA | Western Atlantic: from USA (North Carolina) to Southern Mexican Caribbean, Bahamas, Cuba, and Jamaica [15, 40, 62]                                                                                                    | El Placer [15]              |   | In muddy bottoms, seagrass, under stones, coralline reefs or shell deposits. In extremely low to greater salinity. 1-51 m depth [62] |                                           | +<br><br>BOLD:ACD2717<br>BOLD:ADG5474 |
| <i>Menippe nodifrons</i> Stimpson, 1859        | Indian River, Florida, USA                                      | Western Atlantic: USA (Florida, Louisiana), Mexican Caribbean, Panama, Cuba, Jamaica, St. Thomas, Trinidad, islands off Venezuela, Colombia, Guianas, and Brazil. Eastern Atlantic: Cape Verde to Angola [13, 51, 63] | Punta Herrero, and El Uvero | ✓ | Among coralline rocks with <i>Thalassia testudinum</i> . 0-3 m depth                                                                 | DSCMX001-21<br>DSCMX008-21<br>DSCMX062-21 | +<br><br>BOLD:AAX4629                 |
| Family Mithracidae                             |                                                                 |                                                                                                                                                                                                                       |                             |   |                                                                                                                                      |                                           |                                       |



|                                                          |                                                                |                                                                                                                                                                                                  |                                                                                                                                    |   |                                                                                                                                                                                                                                                                                      |                                                                                                                                                                   |     |                                              |
|----------------------------------------------------------|----------------------------------------------------------------|--------------------------------------------------------------------------------------------------------------------------------------------------------------------------------------------------|------------------------------------------------------------------------------------------------------------------------------------|---|--------------------------------------------------------------------------------------------------------------------------------------------------------------------------------------------------------------------------------------------------------------------------------------|-------------------------------------------------------------------------------------------------------------------------------------------------------------------|-----|----------------------------------------------|
| <i>Amphithrax hemphilli</i><br>(Rathbun, 1892)           | Indian Key,<br>Florida, USA                                    | Western Atlantic: from USA<br>(Florida) to Brazil (Rio de Janeiro);<br>including islands of the Caribbean<br>Arc, and Curaçao [40, 51]                                                           | Rio Indio [15]                                                                                                                     |   | In reef lagoon, among<br>coralline rocks. 1-60 m<br>depth[15, 51]                                                                                                                                                                                                                    |                                                                                                                                                                   | N/A |                                              |
| <i>Maquimithrax<br/>spinosissimus</i><br>(Lamarck, 1818) | “Ile de France”<br>(erroneous<br>according to<br>Rathbun [35]) | Western Atlantic: USA (North<br>Carolina, Florida), from Mexican<br>Caribbean to Nicaragua, Cuba,<br>Virgin Islands, islands of the<br>Caribbean Arc, and islands off<br>Venezuela [13, 51, 62]  | Xahuayxol                                                                                                                          | ✓ | In sandy, rocky and<br>coralline bottoms.<br>Symbiont of barnacles,<br>bryozoans, serpulid worms,<br>and foraminifera. 1-179 m<br>depth [62]                                                                                                                                         | DSCMX096-21                                                                                                                                                       | +   | BOLD:AAG6741                                 |
| <i>Mithraculus<br/>cinctimanus</i> Stimpson,<br>1860     | Tortugas, Florida,<br>USA; and St.<br>Thomas                   | Western Atlantic: USA (Florida<br>Keys), Bahamas, Mexican<br>Caribbean, Virgin Islands, islands<br>of the Caribbean Arc, and islands<br>off Venezuela [13, 40, 51, 66]                           | Xahuayxol                                                                                                                          | ✓ | In rocky and coralline<br>bottoms, associated to sea<br>anemones ( <i>Stichodactyla<br/>helianthus</i> ). 1-20 m depth<br>[62, 66]                                                                                                                                                   | DSCMX090-21                                                                                                                                                       | +   | BOLD:ACG7379                                 |
| <i>Mithraculus coryphe</i><br>(Herbst, 1801)             | Unkown                                                         | Western Atlantic: from USA<br>(Florida) to Brazil (São Paulo);<br>including south of Cuba, Virgin<br>Islands, islands of the Caribbean<br>Arc, and islands off Venezuela [13,<br>40, 51, 62, 63] | El Placer, Rio<br>Indio, El Uvero,<br>Mahahual,<br>Xahuayxol,<br>Xcalak, Banco<br>Chinchorro [14,<br>15, 31], and Punta<br>Herrero | * | In reefs, rocky bottoms,<br>associated with corals<br>( <i>Acropora cervicornis</i> , <i>A.<br/>palmata</i> , <i>Porites</i> sp.),<br>anemones ( <i>Bunodosoma<br/>granuliferum</i> , <i>Stichodactyla<br/>helianthus</i> ), serpulids, and<br>sponges. 1-60 m depth [51,<br>62, 67] | DSCMX039-21<br>DSCMX047-21<br>DSCMX049-21<br>DSCMX057-21<br>DSCMX069-21<br>DSCMX071-21<br>DSCMX075-21<br>DSCMX081-21<br>DSCMX087-21<br>DSCMX088-21<br>DSCMX091-21 | +   | BOLD:ADK5811<br>BOLD:ACT9266<br>BOLD:AAX4686 |

|                                                   |                                                     |                                                                                                                                                                                     |                                                                                                               |   |                                                                                                                                                                                                                                                             |   |                              |
|---------------------------------------------------|-----------------------------------------------------|-------------------------------------------------------------------------------------------------------------------------------------------------------------------------------------|---------------------------------------------------------------------------------------------------------------|---|-------------------------------------------------------------------------------------------------------------------------------------------------------------------------------------------------------------------------------------------------------------|---|------------------------------|
| <i>Mithraculus forceps</i> A. Milne-Edwards, 1875 | French Guiana                                       | Western Atlantic: from USA (North Carolina) to Brazil (Santa Catarina); including Bermuda, Virgin Islands, islands of the Caribbean Arc, and islands off Venezuela [40, 51, 63]     | El Placer, Rio Indio, Mahahual, Punta Herradura, Xahuayxol, Xcalak, and Banco Chinchorro [14, 15, 31]         |   | In rocky shores, muddy, sandy bottoms, under stones and dead coral ( <i>Acropora</i> sp., <i>Porites</i> sp.), sponges ( <i>Ircinia strobilina</i> , <i>Spongia officinalis</i> ), and anemones ( <i>Stichodactyla helianthus</i> ). 1-110 m depth [54, 67] | + | BOLD:AAC9888                 |
| <i>Mithraculus sculptus</i> (Lamarck, 1818)       | Unknown                                             | Western Atlantic: from USA (Florida) to Brazil (São Paulo); including Bahamas, Virgin Islands, islands of the Caribbean Arc, and islands off Venezuela [40, 51, 63]                 | El Placer, Rio Indio, Mahahual, Xcalak, Banco Chinchorro [14, 15, 31], El Uvero, Xahuayxol, and Punta Herrero | * | In sand flats with <i>Thalassia</i> , coralline rubble ( <i>Acropora</i> sp., <i>Porites furcata</i> ), shells ( <i>Aliger</i> ), sponges, and anemones ( <i>S. helianthus</i> and <i>Condylactis gigantea</i> ). 1-55 m depth [13, 62, 65, 67]             | + | BOLD:AAC9887<br>BOLD:ADK5811 |
| <i>Mithrax pleuracanthus</i> Stimpson, 1871       | Key West and Tortugas, Florida, USA; and St. Thomas | Western Atlantic: USA (North Carolina to Florida), Bermuda, Gulf of Mexico, Mexican Caribbean, Virgin Islands, islands of the Caribbean Arc, and islands off Venezuela [13, 40, 51] | Xahuayxol [14], and El Uvero                                                                                  | * | In rocky, gravel, <i>Lobatus</i> shell, muddy bottoms, coralline rubble, and in canals of sponge <i>Ircinia strobilina</i> . Encrusted with bryozoans. 1-51 m depth [13, 39, 51, 65]                                                                        | + | BOLD:ACB5456                 |

|                                                             |                                     |                                                                                                                                                                                                  |                                                                                                                                            |   |                                                                                                                                                                                   |                                                                                                                                                    |     |              |
|-------------------------------------------------------------|-------------------------------------|--------------------------------------------------------------------------------------------------------------------------------------------------------------------------------------------------|--------------------------------------------------------------------------------------------------------------------------------------------|---|-----------------------------------------------------------------------------------------------------------------------------------------------------------------------------------|----------------------------------------------------------------------------------------------------------------------------------------------------|-----|--------------|
| <i>Mithrax tortugae</i><br>Rathbun, 1920                    | Tortugas, Florida,<br>USA           | Western Atlantic: USA (Florida),<br>Bahamas, Southern Mexican<br>Caribbean, islands of the Caribbean<br>Arc, Colombia, Venezuela, Bonaire,<br>Curaçao, and Brazil [51, 63]                       | North of<br>Xahuayxol                                                                                                                      | ✓ | In coralline rocks and<br><i>Thalassia testudinum</i> beds.<br>0.5 m depth                                                                                                        | DSCMX074-21                                                                                                                                        | +   | BOLD:ACB6128 |
| <i>Nonala holderi</i><br>(Stimpson, 1871)                   | Tortugas, Florida,<br>USA           | Western Atlantic: USA (Florida<br>Keys, Dry Tortugas), Gulf of<br>Mexico, Mexican Caribbean, Cuba,<br>Virgin Islands, islands of the<br>Caribbean Arc, and islands off<br>Venezuela [13, 40, 51] | Rio Indio,<br>Mahahual, and<br>Banco<br>Chinchorro [15]                                                                                    |   | In coralline rubble and<br>sponges ( <i>Ircinia strobilina</i> ).<br>1-38 m depth [56, 67]                                                                                        |                                                                                                                                                    | N/A |              |
| <i>Omalacantha</i><br><i>antillensis</i> (Rathbun,<br>1920) | Montego Bay<br>Point, Jamaica       | Western Atlantic: USA (North<br>Carolina, Florida, Gulf of Mexico),<br>Mexican Caribbean, Cuba, islands<br>of the Caribbean Arc, islands off<br>Venezuela, and Brazil [13, 56, 63]               | Xcalak [14]                                                                                                                                |   | Among algae covering<br>coralline rubble. 1-38 m<br>depth [13, 51]                                                                                                                |                                                                                                                                                    | N/A |              |
| <i>Omalacantha bicornuta</i><br>(Latreille, 1825)           | Nouvelle<br>Hollande<br>(Australia) | Western Atlantic: from USA (North<br>Carolina) to Brazil (Rio Grande do<br>Sul); including Bermuda, Virgin<br>Islands, islands of the Caribbean<br>Arc, and islands off Venezuela [51,<br>63]    | El Placer, El<br>Uvero Rio Indio,<br>Mahahual, Punta<br>Herradura,<br>Xahuayxol, Banco<br>Chinchorro [14,<br>15, 31], and Punta<br>Herrero | * | In coralline reefs,<br>macroalgae, rocky, muddy,<br>and sandy bottoms, shell<br>fragments, sponges,<br><i>Thalassia</i> beds, and<br>mangrove roots. 1-70 m<br>depth [13, 62, 65] | DSCMX009-21<br>DSCMX013-21<br>DSCMX024-21<br>DSCMX033-21<br>DSCMX042-21<br>DSCMX050-21<br>DSCMX052-21<br>DSCMX053-21<br>DSCMX060-21<br>DSCMX072-21 | +   | BOLD:AAX4083 |

|                                                                 |                             |                                                                                                                                                                                |                                                                                  |   |                                                                                                                                                       |             |     |                              |
|-----------------------------------------------------------------|-----------------------------|--------------------------------------------------------------------------------------------------------------------------------------------------------------------------------|----------------------------------------------------------------------------------|---|-------------------------------------------------------------------------------------------------------------------------------------------------------|-------------|-----|------------------------------|
| <i>Pitho aculeata</i> (Gibbes, 1850)                            | Key West, Florida, USA      | Western Atlantic: USA (Florida), Bahamas, Mexican Caribbean, Cuba, Virgin Islands, islands of the Caribbean Arc, and islands off Venezuela [13, 40, 51]                        | El Placer, Rio Indio, El Uvero, Mahahual, Xahuayxol, and Xcalak [14, 15]         |   | In sandy, shell, coralline, seagrass, and muddy bottoms, under coralline rubble surrounded by <i>Thalassia</i> , on macroalgae. 1-20 m depth [62, 65] |             | N/A |                              |
| <i>Pitho lherminieri</i> (Desbonne in Desbonne & Schramm, 1867) | Guadeloupe, Lesser Antilles | Western Atlantic: from USA (North Carolina) to Brazil (São Paulo); including Cuba, Virgin Islands, islands of the Caribbean Arc, and islands off Venezuela [51, 62, 63]        | Rio Indio, Mahahual, and Xahuayxol [15, 62]                                      | * | In muddy, sandy, shell, rocky, coralline, and seagrass bottoms; among tunicates and sponges on base of <i>Porites</i> . 1-51 m depth [13, 39]         | DSCMX077-21 | +   | BOLD:AAY3789<br>BOLD:AAH9477 |
| <i>Pitho mirabilis</i> (Herbst, 1794)                           | Unknown                     | Western Atlantic: USA (Florida Keys), Bahamas, Mexican Caribbean, Southern Cuba, islands of the Caribbean Arc, and islands off Venezuela [15, 51, 62]                          | El Placer, Rio Indio, El Uvero Mahahual, Punta Herradura, Xahuayxol [14, 15, 31] |   | In rocky and coralline bottoms. Intertidal [65]                                                                                                       |             | +   | BOLD:ACT8761                 |
| <i>Thoe puella</i> Stimpson, 1860                               | Tortugas Is., Florida, USA  | Western Atlantic: USA (Florida Keys, Dry Tortugas), Bahamas, Mexican Caribbean, Cuba, Virgin Islands, islands of the Caribbean Arc, and islands off Venezuela [13, 51, 62, 65] | Mahahual [15]                                                                    |   | In rocky and corallines bottoms, coral rubble surrounded by <i>Thalassia</i> . 1-27 m depth [51, 62, 65]                                              |             | +   | BOLD:ACU0496                 |

Family Oziidae

|                                                           |                                                   |                                                                                                                                                                                                                          |                                                                       |                                                                                                                         |   |              |
|-----------------------------------------------------------|---------------------------------------------------|--------------------------------------------------------------------------------------------------------------------------------------------------------------------------------------------------------------------------|-----------------------------------------------------------------------|-------------------------------------------------------------------------------------------------------------------------|---|--------------|
| <i>Ozius reticulatus</i><br>(Desbonne, 1867)              | Le Moule,<br>Guadeloupe                           | Western Atlantic: Mexican<br>Caribbean, Panama, Colombia,<br>Virgin Islands, islands of the<br>Caribbean Arc, and islands off<br>Venezuela [13, 51]                                                                      | Mahahual [15]                                                         | In muddy bottom,<br>limestone rocks and<br>coralline rocks. 0-3 m depth<br>[13, 36, 51]                                 | + | BOLD:ACH8409 |
| Family Panopeidae                                         |                                                   |                                                                                                                                                                                                                          |                                                                       |                                                                                                                         |   |              |
| <i>Eurypanopeus abbreviatus</i> (Stimpson, 1860)          | Barbados                                          | Western Atlantic: USA (south<br>Carolina to Florida), Gulf of<br>Mexico, Mexican Caribbean<br>(Cozumel), Cuba, Virgin Islands,<br>islands of the Caribbean Arc,<br>islands off Venezuela, and Brazil<br>[13, 51, 62, 63] | El Placer [15]                                                        | In rocky and sandy shore,<br>oyster beds, under rocks,<br>and between sponges and<br>bryozoans. 0-5 m depth [51,<br>62] | + | BOLD:ACU0495 |
| <i>Eurypanopeus depressus</i> (Smith, 1869)               | New Haven,<br>Connecticut, and<br>Egmont Key, USA | Western Atlantic: USA<br>(Massachusetts, Texas), Bermuda,<br>Mexican Caribbean (Cozumel),<br>Colombia, islands of the Caribbean<br>Arc, Venezuela, Brazil, Uruguay,<br>and Argentina [13, 51, 68]                        | Chetumal Bay<br>(Calderitas, Cayo<br>Venado, Luis<br>Echeverria) [14] | In sandy and rocky beach.<br>On oyster shells. 0-48 m<br>depth [13, 39, 51]                                             | + | BOLD:ACC3657 |
| <i>Eurypanopeus dissimilis</i> (Benedict & Rathbun, 1891) | Trinidad,<br>Trinidad and<br>Tobago               | Western Atlantic: USA (Florida),<br>Gulf of Mexico (Veracruz),<br>Southern Mexican Caribbean,<br>Cuba, Trinidad, Venezuela, and<br>Brazil [13, 51, 63]                                                                   | Chetumal Bay<br>[13–15]                                               | In sandy and rocky beach.<br>0-3 m depth [13, 51]                                                                       | + | BOLD:ADS1127 |

|                                                                          |                                                |                                                                                                                                                                                                           |                                                            |                                                                                                                                                              |                  |                              |
|--------------------------------------------------------------------------|------------------------------------------------|-----------------------------------------------------------------------------------------------------------------------------------------------------------------------------------------------------------|------------------------------------------------------------|--------------------------------------------------------------------------------------------------------------------------------------------------------------|------------------|------------------------------|
| <i>Eurytium limosum</i><br>(Say, 1818)                                   | “Inhabits shores<br>of the Northern<br>States” | Western Atlantic: USA (New York<br>to Florida), Bermuda, Gulf of<br>Mexico, Southern Mexican<br>Caribbean, Virgin Islands, islands<br>of the Caribbean Arc, islands off<br>Venezuela, and Brazil [51, 63] | Bermejo River<br>[14]                                      | In muddy or marshy banks,<br>in burrows partly filled<br>with water, in burrows in<br>sand, under stones, and on<br>coralline reefs. 0-3 m depth<br>[39, 51] | +                | BOLD:ACT8759                 |
| <i>Hexapanopeus</i><br><i>angustifrons</i> (Benedict<br>& Rathbun, 1891) | Long Island<br>Sound,<br>Connecticut, USA      | Western Atlantic: USA<br>(Massachusetts to Florida),<br>Bahamas, Gulf of Mexico<br>(Campeche), Mexican Caribbean<br>(Puerto Morelos), Martinique,<br>Jamaica, and Brazil [13, 51, 63]                     | Xahuayxol [14]                                             | On soft or sandy bottoms.<br>0-139 m depth [39]                                                                                                              | +                | BOLD:ADS3401<br>BOLD:ACI0229 |
| <i>Neopanope packardii</i><br>(Kingsley, 1879)                           | Key West, Florida,<br>USA                      | Western Atlantic: USA (Louisiana,<br>Florida), Bahamas, Mexican<br>Caribbean (Ascension Bay), and<br>Cuba [13, 40]                                                                                        | Rio Indio [15]                                             | In rocky and sandy beach,<br>on <i>Thalassia</i> beds. 1-74 m<br>depth [13, 65, 69]                                                                          | +                | BOLD:ADG6064                 |
| <i>Panopeus harttii</i><br>Smith, 1869                                   | Abrolhos Reefs,<br>Brazil                      | Western Atlantic: USA (Florida),<br>Southern Mexican Caribbean,<br>Cuba, Virgin Islands, islands of the<br>Caribbean Arc, Aruba, and Brazil.<br>Central Atlantic: Ascension Island<br>[51, 62, 63]        | Xahuayxol,<br>Bermejo River<br>[14], and Punta<br>Diamante | *<br>In coralline reefs, rocky<br>bottoms, dead coral,<br>crevices of rocks, calcareous<br>algae, and <i>Halimeda</i> . 1-25 m<br>depth [54, 62]             | DSCMX028-21<br>+ | BOLD:AAX2632                 |

|                                                                         |                                                           |                                                                                                                                                                                                                                                                             |                                                              |   |                                                                                                                                            |             |   |              |
|-------------------------------------------------------------------------|-----------------------------------------------------------|-----------------------------------------------------------------------------------------------------------------------------------------------------------------------------------------------------------------------------------------------------------------------------|--------------------------------------------------------------|---|--------------------------------------------------------------------------------------------------------------------------------------------|-------------|---|--------------|
| <i>Panopeus lacustris</i><br>Desbonne in<br>Desbonne &<br>Schramm, 1867 | Guadeloupe,<br>Lesser Antilles                            | Western Atlantic: USA (Georgia to<br>Florida), Bermuda, Bahamas, Gulf<br>of Mexico (Campeche), Mexican<br>Caribbean, Panama, Colombia,<br>Cuba, Jamaica, Puerto Rico, Virgin<br>Islands, islands of the Caribbean<br>Arc, islands off Venezuela, and<br>Brazil [13, 51, 63] | El Uvero, and El<br>Placer [15]                              |   | In sandy and rocky beach,<br>coral ( <i>Porites</i> sp.), sabellarid<br>reef, in sponge on<br>mangroves. 0-2 m depth<br>[13, 38, 51]       |             | + | BOLD:ACU0442 |
| <i>Panopeus occidentalis</i><br>de Saussure, 1857                       | Guadeloupe,<br>Lesser Antilles                            | Western Atlantic: from USA (North<br>Carolina) to Brazil (Santa Catarina);<br>including Virgin Islands, islands of<br>the Caribbean Arc, and islands off<br>Venezuela [51, 63]                                                                                              | El Placer, Bermejo<br>River, and<br>Chetumal Bay<br>[14, 15] |   | In sandy, rocky and shells<br>bottoms. Among rocks,<br>mangrove roots, sponges,<br>ascidians, and macroalgae.<br>1-20 m depth [38, 51, 62] |             | + | BOLD:AAX2632 |
| <i>Panopeus simpsoni</i><br>(Rathbun, 1930)                             | Saint George's<br>Sound,<br>Apalachicola,<br>Florida, USA | Western Atlantic: Gulf of Mexico<br>(Florida, Texas), and Southern<br>Mexican Caribbean [14, 38]                                                                                                                                                                            | Huach River [14]                                             |   | Shallow intertidal, and<br>subtidal waters [40]                                                                                            |             | + | BOLD:ACC3621 |
| <i>Panopeus</i> sp.                                                     | El Uvero,<br>Quintana Roo,<br>Mexico                      | Southern Mexican Caribbean                                                                                                                                                                                                                                                  | El Uvero                                                     | ✓ | Coralline rocks in <i>Thalassia</i><br><i>testudinum</i> beds. 0.5 m<br>depth                                                              | DSCMX006-21 | + | BOLD:AEL3942 |
| <i>Rhithropanopeus</i><br><i>harrisii</i> (Gould, 1841)                 | Charles River,<br>Massachusetts,<br>USA                   | Western Atlantic: from Canada<br>(Gulf of St. Lawrence) to Southern<br>Mexican Caribbean, Panama, and<br>Venezuela. European Atlantic<br>coast: Northern, Baltic,<br>Mediterranean, Black, Azov, and<br>Caspian seas [40, 51, 70]                                           | Xahuayxol [14]                                               |   | In estuaries, associated<br>with oyster or in decaying<br>vegetation. 0-37 m depth<br>[39]                                                 |             | + | BOLD:AAA2223 |

|                                                 |                            |                                                                                                                                                                                                                                                                                                                                                     |                                                |                                                                                                                                                                                                                                                                                                                           |     |                              |
|-------------------------------------------------|----------------------------|-----------------------------------------------------------------------------------------------------------------------------------------------------------------------------------------------------------------------------------------------------------------------------------------------------------------------------------------------------|------------------------------------------------|---------------------------------------------------------------------------------------------------------------------------------------------------------------------------------------------------------------------------------------------------------------------------------------------------------------------------|-----|------------------------------|
| <i>Percnon gibbesi</i> (H. Milne Edwards, 1853) | Antilles                   | Western Atlantic: from USA (North Carolina) to Brazil; including Bermuda, Virgin Islands, islands of the Caribbean Arc, and islands off Venezuela. Eastern Atlantic: from Portugal (Azores) to south Africa. Mediterranean Sea. Eastern Pacific: from Mexico (Baja California) to Chile; including Clipperton Island and Galapagos Islands [13, 62] | El Uvero [15]                                  | In rocky areas, associated with <i>Diadema antillarum</i> . Found in contents of <i>Cephalopholis fulva</i> , <i>Epinephelus adscensionis</i> , <i>Rypticus saponaceus</i> , <i>Lutjanus apodus</i> , <i>Halichoeres radiatus</i> , <i>Diodon hystrix</i> , and <i>Antennarius multiocellatus</i> . 1-15 m depth [39, 62] | +   | BOLD:AAC3991<br>BOLD:AAC3992 |
| Family Pilumnidae                               |                            |                                                                                                                                                                                                                                                                                                                                                     |                                                |                                                                                                                                                                                                                                                                                                                           |     |                              |
| <i>Pilumnus floridanus</i> Stimpson, 1871       | Tortugas, Florida, USA     | Western Atlantic: USA (North Carolina, Florida), Bahamas, Mexican Caribbean, south Cuba, Honduras, Virgin Islands, islands of the Caribbean Arc, islands off Venezuela, and Brazil [13, 51, 62]                                                                                                                                                     | Banco Chinchorro (outside of Central Key) [15] | In sponges, sandy, muddy, rocky, coralline, and shell bottoms. 1-143 m depth [39, 62]                                                                                                                                                                                                                                     | +   | BOLD:ADG1273<br>BOLD:ADX1288 |
| Family Pinnotheridae                            |                            |                                                                                                                                                                                                                                                                                                                                                     |                                                |                                                                                                                                                                                                                                                                                                                           |     |                              |
| <i>Glassella floridana</i> (Rathbun, 1918)      | Marco Island, Florida, USA | Western Atlantic: USA (North Carolina to Florida), Gulf of Mexico, Southern Mexican Caribbean, Cuba, and Venezuela [14, 51, 71]                                                                                                                                                                                                                     | Xahuayxol [14]                                 | Encrusted in shell-fragment and tubes of polychaete ( <i>Diopatra cuprea</i> ). Associated with ascidians and soft coral ( <i>Leptogorgia virgulata</i> ). In water column over seagrass beds. 1-55 m depth [39, 71]                                                                                                      | N/A |                              |



|                                                                       |                                              |                                                                                                                                                                                                                                                                                                       |                                                      |                                                                                                  |     |              |
|-----------------------------------------------------------------------|----------------------------------------------|-------------------------------------------------------------------------------------------------------------------------------------------------------------------------------------------------------------------------------------------------------------------------------------------------------|------------------------------------------------------|--------------------------------------------------------------------------------------------------|-----|--------------|
| <i>Parapinnixa bouvieri</i><br>Rathbun, 1918                          | Off Cape Catoche,<br>Quintana Roo,<br>Mexico | Western Atlantic: USA (south<br>Carolina, Florida), Mexican<br>Caribbean, and Puerto Rico [13, 40]                                                                                                                                                                                                    | Mahahual, Punta<br>Herradura, and<br>Xahuayxol [14]  | Among ventral spines of a<br>rose sea urchin. 1-73 m<br>depth [39]                               | N/A |              |
| <i>Parapinnixa hendersoni</i><br>Rathbun, 1918                        | Los Arroyos,<br>Cuba                         | Western Atlantic: USA (North<br>Carolina, Florida), Mexican<br>Caribbean, Cuba, islands of the<br>Caribbean Arc, islands off<br>Venezuela, and Brazil [13, 51]                                                                                                                                        | El Placer,<br>Mahahual, and<br>Xahuayxol [14,<br>15] | Free swimming in surface<br>plankton at night. 1-84 m<br>depth [39]                              | N/A |              |
| <i>Pinnixa cylindrica</i><br>(Say, 1818)                              | Jekyll Island,<br>Georgia, USA               | Western Atlantic: USA<br>(Massachusetts to Florida), and<br>Southern Mexican Caribbean [14,<br>40]                                                                                                                                                                                                    | Xahuayxol [14]                                       | In burrows of annelids<br>( <i>Arenicola cristata</i> ).<br>Intertidal [39]                      | +   | BOLD:ADZ6438 |
| Family Plagusiidae                                                    |                                              |                                                                                                                                                                                                                                                                                                       |                                                      |                                                                                                  |     |              |
| <i>Euchirograpsus</i><br><i>americanus</i> A. Milne-<br>Edwards, 1880 | Barbados                                     | Western Atlantic: USA (from North<br>Carolina to Florida), Southern<br>Mexican Caribbean, islands of the<br>Caribbean Arc, and from Colombia<br>to Venezuela [15, 40, 51]                                                                                                                             | Mahahual [15]                                        | 30-508 m depth [51]                                                                              | N/A |              |
| <i>Plagusia depressa</i><br>(Fabricius, 1775)                         | Mediterranean<br>Sea                         | Western Atlantic: from USA (North<br>Carolina) to Brazil (Pernambuco);<br>including Bermuda, Virgin Islands,<br>islands of the Caribbean Arc, and<br>islands off Venezuela. Eastern<br>Atlantic: from Morocco to northern<br>Angola; including Azores, Madeira,<br>and St. Helena Island [13, 51, 62] | El Placer [15]                                       | Among coralline rocks, in<br>tide pools. Transported on<br>ships' hulls. 1-5 m depth<br>[34, 37] | +   | BOLD:ACT9499 |

|                                               |                                                                  |                                                                                                                                                                                                                                        |                                               |   |                                                                                                                              |                            |   |                              |
|-----------------------------------------------|------------------------------------------------------------------|----------------------------------------------------------------------------------------------------------------------------------------------------------------------------------------------------------------------------------------|-----------------------------------------------|---|------------------------------------------------------------------------------------------------------------------------------|----------------------------|---|------------------------------|
| <i>Plagusia immaculata</i><br>Lamarck, 1818   | Cocos-Keeling<br>Islands, Indian<br>Ocean                        | Western Atlantic: Southern<br>Mexican Caribbean, Costa Rica to<br>Panama. Eastern Pacific (from<br>Southern Sinaloa, Mexico, to Santa<br>Elena Bay, Ecuador); Coco and<br>Galapagos Islands. Indo-Pacific [34,<br>72, 73]              | El Uvero                                      | ✓ | In supralittoral rocks                                                                                                       | DSCMX005-21<br>DSCMX011-21 | + | BOLD:AAE4759<br>BOLD:ABA0511 |
| Family Portunidae                             |                                                                  |                                                                                                                                                                                                                                        |                                               |   |                                                                                                                              |                            |   |                              |
| <i>Achelous ordwayi</i><br>Stimpson, 1860     | Key Biscayne and<br>Tortugas, Florida,<br>USA; and St.<br>Thomas | Western Atlantic: USA<br>(Massachusetts to Florida), Gulf of<br>Mexico, Mexican Caribbean, and<br>from Colombia to Brazil; including<br>Virgin Islands, islands of the<br>Caribbean Arc, and islands off<br>Venezuela [13, 15, 51, 63] | Mahahual,<br>Xahuayxol, and<br>Xcalak<br>[14] |   | On sandy, coralline, gravel,<br>and broken shells bottoms.<br>Associated with calcareous<br>algae. 1-110 m depth<br>[39, 74] |                            | + | BOLD:ACD2559                 |
| <i>Achelous tumidulus</i><br>Stimpson, 1871   | West of Tortugas,<br>and off Conch<br>Reef, Florida,<br>USA      | Western Atlantic: USA (Florida),<br>Bermuda, Gulf of Mexico, Southern<br>Mexican Caribbean, Cuba, Virgin<br>Islands, islands of the Caribbean<br>Arc, islands off Venezuela, and<br>Brazil [14, 40, 51, 63]                            | Mahahual, and<br>Xahuayxol [14]               |   | On sandy, rocky, coralline,<br>and algae bottoms. 1-75 m<br>depth [51, 54]                                                   |                            | + | BOLD:ADW6978                 |
| <i>Arenaeus cribrarius</i><br>(Lamarck, 1818) | Brazil                                                           | Western Atlantic: from USA<br>(Massachusetts) to Argentina<br>(Buenos Aires); including Bermuda,<br>islands of the Caribbean Arc, and<br>islands off Venezuela [51, 63, 68]                                                            | El Placer [15]                                |   | In sandy beach. 1-68 m<br>depth [13, 51]                                                                                     |                            | + | BOLD:AAM8140                 |

|                                                        |                                                             |                                                                                                                                                                                                                                            |                                              |   |                                                                                                                                                                  |             |   |                              |
|--------------------------------------------------------|-------------------------------------------------------------|--------------------------------------------------------------------------------------------------------------------------------------------------------------------------------------------------------------------------------------------|----------------------------------------------|---|------------------------------------------------------------------------------------------------------------------------------------------------------------------|-------------|---|------------------------------|
| <i>Callinectes bocourti</i> A. Milne Edwards, 1879     | Mullins River, Belize                                       | Western Atlantic: from USA (North Carolina to Florida) to Belize (Mullins River), Costa Rica, Virgin Islands, islands of the Caribbean Arc, islands off Venezuela, Suriname, and Brazil [51, 63]                                           | Chetumal Bay (Tamalcab) [14]                 |   | In shallow brackish waters, over muddy to sandy bottoms. Tolerant of stagnant or polluted environments. 0-20 m depth [39, 51]                                    |             | + | BOLD:ACD2534                 |
| <i>Callinectes danae</i> Smith, 1869                   | Pernambuco, Brazil                                          | Western Atlantic: from USA (North Carolina, Florida) to Southern Mexican Caribbean, Bermuda, Cuba, Colombia, Virgin Islands, islands of the Caribbean Arc, islands off Venezuela, and Uruguay. Mediterranean Sea [13, 51, 63]              | Huach River [14]                             |   | From brackish to high-salinity waters, on mangroves, and on muddy estuaries. Also on sandy beaches and algae-covered broken shell bottoms. 1-75 m depth [39, 54] |             | + | BOLD:ACD2797                 |
| <i>Callinectes marginatus</i> (A. Milne-Edwards, 1861) | Gabonese Republic, Africa                                   | Western Atlantic: from USA (Virginia to Florida) to Brazil (São Paulo); including Bermuda, Cuba, Virgin Islands, islands of the Caribbean Arc, and islands off Venezuela. Eastern Atlantic: Cape Verde, Senegal to central Angola [51, 63] | El Uvero, Rio Indio [15]; and Huach River    | * | In intertidal pools, on muddy and sandy beaches with algae and <i>Thalassia</i> , sandy-rocky beaches, and mangroves. 1-25 m depth [51, 62, 75]                  | DSCMX095-21 | + | BOLD:ACC4630                 |
| <i>Callinectes ornatus</i> Ordway, 1863                | Cumana; Hayti; Bahamas; Tortugas and Charleston Harbor, USA | Western Atlantic: USA (Virginia to Florida), Gulf of Mexico, Mexican Caribbean, and from Colombia to Brazil; including Virgin Islands, islands of the Caribbean Arc, and islands off Venezuela [13, 51, 63]                                | El Placer, Rio Indio [15]; and Punta Herrero | * | In sandy or muddy bottom. Young specimens found on shell and sponge bottoms. 1-75 m [39, 51]                                                                     | DSCMX056-21 | + | BOLD:ACD1578<br>BOLD:ADC7937 |

|                                              |                                                                                               |                                                                                                                                                                                                                                                                                                                                                                     |                                                                   |   |                                                                                                                            |                            |     |                              |
|----------------------------------------------|-----------------------------------------------------------------------------------------------|---------------------------------------------------------------------------------------------------------------------------------------------------------------------------------------------------------------------------------------------------------------------------------------------------------------------------------------------------------------------|-------------------------------------------------------------------|---|----------------------------------------------------------------------------------------------------------------------------|----------------------------|-----|------------------------------|
| <i>Callinectes sapidus</i><br>Rathbun, 1896  | East coast of<br>United States                                                                | Western Atlantic: USA (Virginia to Florida), Gulf of Mexico, Mexican Caribbean, Cuba, Virgin Islands, islands of the Caribbean Arc, Curaçao, Brazil, Uruguay, and Argentina. East Atlantic: Denmark, Netherlands, North Sea, France, and Gulf of Genova. Adriatic Sea. Aegean Sea. Western of Black Sea. Eastern Mediterranean. Western Pacific: Japan [13, 51, 63] | Xahuayxol ,<br>Chetumal Bay<br>[14, 15, 76], and<br>Punta Herrero | * | Sandy and rocky bottoms,<br>mangrove, mouth of rivers,<br>estuaries, and shallow<br>ocean waters. 1-90 m depth<br>[51, 62] | DSCMX054-21<br>DSCMX055-21 | +   | BOLD:AAB6460<br>BOLD:ACD2034 |
| <i>Callinectes similis</i><br>Williams, 1966 | off beach between<br>St. Johns River<br>jetties and<br>Jacksonville<br>Beach, Florida,<br>USA | Western Atlantic: USA (From Delaware Bay to Florida), Gulf of Mexico (Campeche, Yucatan), Southern Mexican Caribbean, Cuba, Jamaica, Colombia, and Brazil [14, 15, 62]                                                                                                                                                                                              | Mahahual, and<br>Xahuayxol [14,<br>15]                            |   | In sandy or muddy shores;<br>rarely in estuarine waters.<br>1-92 m depth [62]                                              |                            | N/A |                              |
| <i>Portunus anceps</i><br>(Saussure, 1857)   | Cuba                                                                                          | Western Atlantic: USA (North Carolina, Florida), Bermuda, Gulf of Mexico, Southern Mexican Caribbean, Virgin Islands, islands of the Caribbean Arc, Curaçao, and Brazil [15, 51, 63]                                                                                                                                                                                | Rio Indio [15]                                                    |   | On sandy, muddy, algae,<br>shells bottoms. 1-103 m<br>depth [51, 54]                                                       |                            | +   | BOLD:ACC4519                 |

|                                                       |                             |                                                                                                                                                                                                                |                |   |                                                                                                                                       |                            |   |              |
|-------------------------------------------------------|-----------------------------|----------------------------------------------------------------------------------------------------------------------------------------------------------------------------------------------------------------|----------------|---|---------------------------------------------------------------------------------------------------------------------------------------|----------------------------|---|--------------|
| <i>Portunus sayi</i> (Gibbes, 1850)                   | South Carolina, USA         | Western Atlantic: from Canada through the Gulf of Mexico, Bermuda, Mexican Caribbean, Virgin Islands, islands of the Caribbean Arc, Guianas, and Brazil. Eastern Atlantic: Canary Islands and Morocco [13, 62] | Huach River    | ✓ | Pelagic, living among <i>Sargassum</i> masses. 0-5 m depth [51, 62]                                                                   | DSCMX079-21<br>DSCMX080-21 | + | BOLD:ACD2337 |
| <i>Portunus ventralis</i> (A. Milne-Edwards, 1879)    | Guadeloupe, Lesser Antilles | Western Atlantic: USA (Georgia, Florida), Mexican Caribbean, Virgin Islands, islands of the Caribbean Arc, Bonaire, Venezuela, and Brazil [51, 63, 74]                                                         | El Placer [15] |   | On sandy bottom or sandy beaches with patches of <i>Thalassia</i> and coralline rubble. Also in tide pools. 1-25 m depth [51, 65, 74] |                            | + | BOLD:ACD1603 |
| Family                                                |                             |                                                                                                                                                                                                                |                |   |                                                                                                                                       |                            |   |              |
| Pseudorhombilidae                                     |                             |                                                                                                                                                                                                                |                |   |                                                                                                                                       |                            |   |              |
| <i>Micropanope sculptipes</i> Stimpson, 1871          | Florida Keys, USA           | Western Atlantic: USA (North Carolina, south Carolina, Florida, Texas), Southern Mexican Caribbean, islands of the Caribbean Arc, and Brazil [14, 40, 51, 63]                                                  | Xahuayxol [14] |   | On sandy, gravel, and coralline bottoms. 10-311 m depth [54]                                                                          |                            | + | BOLD:ADG2496 |
| <i>Micropanope truncatifrons</i> Rathbun, 1898        | off Havana, Cuba            | Western Atlantic: Gulf of Mexico (Yucatan), Southern Mexican Caribbean, and Cuba [14, 77]                                                                                                                      | Xahuayxol [14] |   | 1-342 m depth [14, 36]                                                                                                                |                            | + | BOLD:ADS4381 |
| <i>Nanoplax xanthiformis</i> (A. Milne-Edwards, 1880) | Grenada                     | Western Atlantic: USA (North Carolina, Gulf of Mexico), Southern Mexican Caribbean, islands of the Caribbean Arc, Curaçao, and Brazil [15, 40, 56, 78]                                                         | El Placer [15] |   | In various types of bottom. 9-333 m depth [39, 51]                                                                                    |                            | + | BOLD:ADT8512 |

|                                                     |                             |                                                                                                                                                                                  |                                                                                     |   |                                                                                      |             |     |                                                   |
|-----------------------------------------------------|-----------------------------|----------------------------------------------------------------------------------------------------------------------------------------------------------------------------------|-------------------------------------------------------------------------------------|---|--------------------------------------------------------------------------------------|-------------|-----|---------------------------------------------------|
| <i>Scopoliuss nuttingi</i><br>(Rathbun, 1898)       | Bahamas Banks               | Western Atlantic: from USA (North Carolina, Florida) from Brazil (São Paulo); including Virgin Islands, and islands of the Caribbean Arc [40, 51, 63]                            | Mahahual, Punta Herradura, Xahuayxol, Banco Chinchorro [14, 15], and Punta Diamante | * | In <i>Porites</i> clumps, and <i>Halimeda</i> . 1-183 m depth [39]                   | DSCMX029-21 | +   | BOLD:ADV4694<br>(as <i>Micropanope nuttingi</i> ) |
| Family Raninidae                                    |                             |                                                                                                                                                                                  |                                                                                     |   |                                                                                      |             |     |                                                   |
| <i>Symethis variolosa</i><br>(J.C. Fabricius, 1787) | “In oceano Indico”          | Western Atlantic: USA (North Carolina to Florida), Gulf of Mexico, Southern Mexican Caribbean, Guadeloupe, Venezuela, and Brazil [14, 51, 63]                                    | Mahahual [14]                                                                       |   | In calcareous algae and sand. 18-137 m depth [39]                                    |             | N/A |                                                   |
| Family Sesarmidae                                   |                             |                                                                                                                                                                                  |                                                                                     |   |                                                                                      |             |     |                                                   |
| <i>Armases cinereum</i><br>(Bosc, 1801)             | South Carolina, USA         | Western Atlantic: USA (from Maryland to Florida), and Mexico (Veracruz, Quintana Roo) [14, 40]                                                                                   | Chetumal Bay (Venado Key and Santa Lucia) [14]                                      |   | Among rubble, marshes, and in drier areas of <i>Rhizophora</i> . Intertidal [34, 69] |             | +   | BOLD:ACM2439                                      |
| <i>Armases miersii</i><br>(Rathbun, 1897)           | Great Abaco Island, Bahamas | Western Atlantic: USA (Florida), Southern Mexican Caribbean, Dominica, and Aruba [14, 51, 69]                                                                                    | Chetumal Bay (Venado Key) [14]                                                      |   | In mudflat. Intertidal [79]                                                          |             | N/A |                                                   |
| <i>Sesarma curacaoense</i><br>de Man, 1892          | Curaçao                     | Western Atlantic: USA (Florida), Southern Mexican Caribbean, north coast of Cuba, Panama, and from Venezuela to Brazil; including Jamaica, Puerto Rico, and Curaçao [14, 22, 62] | Chetumal Bay (Venado Key) [14]                                                      |   | In muddy and rocky beaches, among mangroves. Mesolittoral [62]                       |             | +   | BOLD:ACT9653                                      |

|                                                          |                                  |                                                                                                                                                                                                                           |                                                                                           |                                                                                                                                                |   |                                                                                                                                      |
|----------------------------------------------------------|----------------------------------|---------------------------------------------------------------------------------------------------------------------------------------------------------------------------------------------------------------------------|-------------------------------------------------------------------------------------------|------------------------------------------------------------------------------------------------------------------------------------------------|---|--------------------------------------------------------------------------------------------------------------------------------------|
| <i>Cyclograpsus integer</i><br>H. Milne Edwards,<br>1837 | Brazil                           | Western Atlantic: from USA (Florida) to Brazil (Rio Grande do Sul); including Virgin Islands, islands of the Caribbean Arc, and islands off Venezuela. Eastern Atlantic: Africa (from Cape Verde to Senegal) [13, 51, 63] | El Uvero, Rio Indio, and Chetumal Bay [14, 15]                                            | Among rocks and dead algae. Intertidal [34, 79]                                                                                                | + | BOLD:ACT8869                                                                                                                         |
| Family Xanthidae                                         |                                  |                                                                                                                                                                                                                           |                                                                                           |                                                                                                                                                |   |                                                                                                                                      |
| <i>Actaea acantha</i> (H. Milne-Edwards,<br>1834)        | Unknown                          | Western Atlantic: from USA (Florida) to Mexican Caribbean, Brazil, and Uruguay; including Bermuda, Bahamas, Cuba, Jamaica, Haiti, Puerto Rico, St. Barthélemy, and Guadeloupe [13, 51, 62, 68]                            | Rio Indio, and Mahahual [15]                                                              | In rocky, sandy, coralline, muddy, and shell bottoms. 1-25 m depth [51, 62]                                                                    | + | BOLD:ADC8653                                                                                                                         |
| <i>Banareia palmeri</i><br>(Rathbun, 1894)               | Rodriguez Creek,<br>Florida, USA | Western Atlantic: USA (Florida), Bahamas, Mexican Caribbean, Cuba, Haiti, Virgin Islands, islands of the Caribbean Arc, and Curaçao [13, 36, 51]                                                                          | Punta Herradura, Xahuayxol, and Mahahual [14, 15]                                         | In sponges and coral ( <i>Porites furcate</i> ). 2-145 m depth [36, 51]                                                                        | + | BOLD:ADS6253                                                                                                                         |
| <i>Cataleptodius floridanus</i> (Gibbes,<br>1850)        | Key West, Florida,<br>USA        | Western Atlantic: from USA (Florida) to Brazil (São Paulo); including Bermuda, Bahamas, Virgin Islands, islands of the Caribbean Arc, and islands off Venezuela. Eastern Atlantic: Guinea to Gabon [13, 51, 63]           | Xcalak, El Uvero, Rio Indio [14, 15], Punta Herrero, Mahahual, Xahuayxol, and Huach River | * On coral, <i>Sargassum</i> , <i>Thalassia</i> flats, sponges, sandy, muddy, seagrass bottoms, tide pools and under stones. 0-33 m depth [65] | + | BOLD:AAI1248<br>DSCMX023-21<br>DSCMX037-21<br>DSCMX043-21<br>DSCMX046-21<br>DSCMX058-21<br>DSCMX063-21<br>DSCMX070-21<br>DSCMX085-21 |

|                                                 |                           |                                                                                                                                                                                                                                                                                                        |                                                         |                                                                                                                                            |     |              |
|-------------------------------------------------|---------------------------|--------------------------------------------------------------------------------------------------------------------------------------------------------------------------------------------------------------------------------------------------------------------------------------------------------|---------------------------------------------------------|--------------------------------------------------------------------------------------------------------------------------------------------|-----|--------------|
| <i>Etisus maculatus</i><br>(Stimpson, 1860)     | Tortugas, Florida,<br>USA | Western Atlantic: Bahamas, USA<br>(Florida), north coast of Cuba,<br>Mexican Caribbean (Puerto<br>Morelos), Belize, Honduras,<br>Colombia, Puerto Rico, St. Thomas,<br>St. Martin, and islands off<br>Venezuela [40, 50, 51, 63]                                                                       | Banco<br>Chinchorro<br>(Lobos Key) [31]                 | In coral reefs, rocky<br>substrates, sand, <i>Thalassia</i><br>flats, and <i>Lobatus</i> shells. 0-3<br>m depth [13, 51, 65]               | +   | BOLD:ADS8924 |
| <i>Glyptoxanthus erosus</i><br>(Stimpson, 1859) | Florida, USA              | Western Atlantic: USA (North<br>Carolina, Louisiana), Bahamas,<br>Mexico (Campeche, Yucatan,<br>Quintana Roo), through West<br>Indies to Guadeloupe [36, 39]                                                                                                                                           | Mahahual [15]                                           | In rocks, algae ( <i>Halimeda</i> ),<br>coarse sand, sponges, and<br>coralline reefs. 1-90 m<br>depth [39]                                 | +   | BOLD:ACB4505 |
| <i>Melybia thalamita</i><br>Stimpson, 1871      | Tortugas, Florida,<br>USA | Western Atlantic: USA (North<br>Carolina, Florida), Bahamas, Gulf<br>of Mexico, Southern Mexican<br>Caribbean, Panama, islands of the<br>Caribbean Arc, Curaçao, and Brazil<br>[15, 51, 63]                                                                                                            | Banco<br>Chinchorro [15]                                | Under <i>Sargassum</i> , coral and<br>broken shells. 2-367 m<br>depth [39, 51]                                                             | +   | BOLD:ADF9588 |
| <i>Paractaea nodosa</i><br>(Stimpson, 1860)     | Tortugas, Florida,<br>USA | Western Atlantic: USA (North<br>Carolina, Florida), Bahamas, Gulf<br>of Mexico, Southern Mexican<br>Caribbean, Cuba, Jamaica, Haiti,<br>Puerto Rico, Virgin Islands, islands<br>of the Caribbean Arc, islands off<br>Venezuela, and Uruguay. Central<br>Atlantic: Ascension Island [15, 40,<br>51, 54] | Banco<br>Chinchorro<br>(outside of<br>Central Key) [15] | In coralline, stone, broken<br>shell, and sandy bottoms,<br>sponges, coral rubble, and<br><i>Thalassia</i> beds. 1-310 m<br>depth [54, 65] | N/A |              |



|                                                              |                         |                                                                                                                                                                                                                                                  |                                                                |                                                                                                                    |   |              |
|--------------------------------------------------------------|-------------------------|--------------------------------------------------------------------------------------------------------------------------------------------------------------------------------------------------------------------------------------------------|----------------------------------------------------------------|--------------------------------------------------------------------------------------------------------------------|---|--------------|
| <i>Paraliomera dispar</i><br>(Stimpson, 1871)                | Cruz del Padre,<br>Cuba | Western Atlantic: From USA<br>(Florida) to islands off Venezuela<br>[51, 62]                                                                                                                                                                     | Mahahual [14]                                                  | In rocky, sandy, and<br>muddy bottoms, coralline<br>reefs, shell, and seagrass<br>areas. 1-154 m depth [62,<br>65] | + | BOLD:ACH4832 |
| <i>Platyactaea setigera</i> (H.<br>Milne Edwards, 1834)      | Antilles                | Western Atlantic: Bermuda,<br>Bahamas, USA (Florida), Mexican<br>Caribbean, Honduras, Colombia,<br>Cuba, Jamaica, Puerto Rico, Virgin<br>Islands, islands of the Caribbean<br>Arc, and islands off Venezuela [13,<br>51, 62]                     | El Placer,<br>Mahahual, and<br>Banco<br>Chinchorro [14,<br>15] | In rocky, coralline bottoms,<br>and macroalgae ( <i>Caulerpa</i><br>sp.). 1-65 m depth [62, 16]                    | + | BOLD:ADU1947 |
| <i>Platypodiella</i><br><i>spectabilis</i> (Herbst,<br>1794) | Unknown                 | Western Atlantic: Bermuda,<br>Bahamas, USA (Florida, Texas),<br>Mexico (Veracruz, Quintana Roo),<br>Honduras, Jamaica, Puerto Rico,<br>Virgin Islands, islands of the<br>Caribbean Arc, islands off<br>Venezuela, and Brazil [13, 40, 51,<br>63] | Mahahual [15]                                                  | In coralline reefs, under<br>stones, and sponges. 1-62 m<br>depth [51, 65]                                         | + | BOLD:ACS6299 |

|                                                     |             |                                                                                                                                                                                                                                                                                           |               |                                                                                                    |           |              |
|-----------------------------------------------------|-------------|-------------------------------------------------------------------------------------------------------------------------------------------------------------------------------------------------------------------------------------------------------------------------------------------|---------------|----------------------------------------------------------------------------------------------------|-----------|--------------|
| <i>Williamstimpsonia denticulatus</i> (White, 1848) | West Indies | Western Atlantic: from USA (Florida) to Panama, and Brazil; including Bermuda, Bahamas, Cuba, Jamaica, Puerto Rico, Virgin Islands, islands of the Caribbean Arc, islands off Venezuela. Eastern Atlantic: islands of Gulf of Guinea. Central Atlantic: Ascension Island [13, 51, 62, 63] | Mahahual [15] | In tide pools, coralline reefs, under stones, and beds of <i>Thalassia</i> . 1-21 m depth [51, 65] | +         | BOLD:AAH9312 |
| <b>Number of taxa</b>                               | <b>98</b>   |                                                                                                                                                                                                                                                                                           | <b>21</b>     | <b>21</b>                                                                                          | <b>75</b> |              |
